# Supplementary material
Source: PubMed Central journal article supplement (PMC4771362)

## **Supplemental Material**

### **Maresin 1 Biosynthesis and Pro-resolving Anti-Infective Functions with Human Localized Aggressive Periodontitis Leukocytes**

Chin-Wei Wang,<sup>\*†‡</sup> Romain A. Colas,<sup>\*</sup> Jesmond P. Dalli,<sup>\*</sup> Hildur H. Arnardottir,<sup>\*</sup>  
Daniel Nguyen,<sup>‡</sup> Hatice Hasturk,<sup>‡</sup> Nan Chiang,<sup>\*</sup> Thomas E. Van Dyke,<sup>†‡</sup>  
and Charles N. Serhan<sup>\*†</sup>

<sup>\*</sup>Center for Experimental Therapeutics and Reperfusion Injury, Department of Anesthesiology, Perioperative and Pain Medicine, Harvard Institutes of Medicine, Brigham and Women's Hospital and Harvard Medical School, Boston, MA 02115

<sup>†</sup>Division of Periodontology, Department of Oral Medicine, Infection, and Immunity, Harvard School of Dental Medicine, Boston, MA 02115

<sup>‡</sup>Department of Periodontology, The Forsyth Institute, Cambridge, MA 02142

**Supplemental Figure 1.** MaR1 enhances macrophage intracellular ROS generation with *P. gingivalis* and *A. actinomycetemcomitans*. **(A)** Macrophages from healthy donors ( $5 \times 10^4$  cells/ well) were incubated with fluorescent carboxy-H<sub>2</sub>DCF-DA for 30 min before incubation with vehicle (PBS<sup>+/+</sup>, 37°C, pH=7.4) or MaR1 (10 pM- 100 nM) for 15 min followed by addition of bacteria (Mφ: bacterium; 1:50) for 60 min. Intracellular ROS generation was assessed using a fluorescence plate reader. Results are expressed as percent increase above vehicle; mean± SEM, n=5, \*p<0.05, \*\*p<0.01, \*\*\*p<0.001 vs. vehicle alone. **(B)** Macrophages ( $2 \times 10^4$  cells/ well) from LAP and matched HC were pre-incubated with carboxy-H<sub>2</sub>DCF-DA for 30 min before incubation (37°C) with vehicle (PBS<sup>+/+</sup>, pH=7.4) or MaR1 (1 nM) for 15 min followed by addition of bacteria (Mφ: bacterium; 1:50) for 60 min. Intracellular ROS generation was assessed using a fluorescence plate reader. Results are expressed as percent increase above vehicle; mean± SEM, n=5 paired donors, ##p<0.01, ###P<0.001, HC vs. HC plus vehicle, \*\*p<0.01, \*\*\*p<0.001, LAP vs. LAP plus vehicle; † † p<0.01 HC plus bacteria, MaR1 vs. vehicle alone, §p<0.05, §§p<0.01 LAP plus bacteria, MaR1 vs. vehicle alone. *Inset* is the relative fluorescence unit (RFU) in the absence of bacteria.

**Supplemental Figure 2.** Representative images of the bacterial cultures following incubation of macrophages from HC and LAP patients with vehicle (PBS<sup>+/+</sup>, 37°C, pH=7.4) or MaR1 (1 nM).

**Supplemental Figure 3.** MaR1 enhances neutrophil intracellular ROS generation for *P. gingivalis* and *A. actinomycetemcomitans*. Isolated human PMNs ( $10^5$  cells/ well) from

HC and LAP patients were incubated with carboxy-H<sub>2</sub>DCF-DA for 30 min. Vehicle (PBS<sup>+/+</sup>, 37°C, pH=7.4) or MaR1 (0.1 pM- 100 nM) was then added to PMN for 15 min prior to addition of the bacteria (PMN: bacterium; 1:50) for 60 min. The intracellular ROS production was quantified using a fluorescence plate reader. Results are expressed as percent changes normalized to HC; mean± SEM, n=7, #p<0.05, ##p<0.01, ###p<0.001, HC vs. HC plus vehicle, \*p<0.05, \*\*p<0.01, LAP vs. LAP plus vehicle.

**Supplemental Figure 4.** MaR1 enhances macrophage phagocytosis of *F. nucleatum*.

Incubation of vehicle (PBS<sup>+/+</sup>, 37°C, pH=7.4) or MaR1 (10 pM- 100 nM) with macrophages from healthy donors (5x10<sup>4</sup> cells/ well) for 15 min prior to addition of fluorescence-labeled bacteria (Mφ: bacterium; 1:50). Phagocytosis was assessed by a fluorescence plate reader. Results are expressed as percent increase above vehicle; mean± SEM, n=4 healthy donors, \*p<0.05, \*\*p<0.01 vs. vehicle alone.

**Supplemental Figure 5.** Maresin 1 levels were reduced after pathogen incubations. (A)

Levels of Maresin 1 in macrophage incubations with and without periodontal pathogens were determined using LC-MS-MS based LM-metabololipidomics (see *Methods* for details). Results are expressed as % of vehicle; mean ± SEM, n=4 (B) Representative levels of Maresin 1 in macrophage incubations from one paired HC and LAP patients.

A

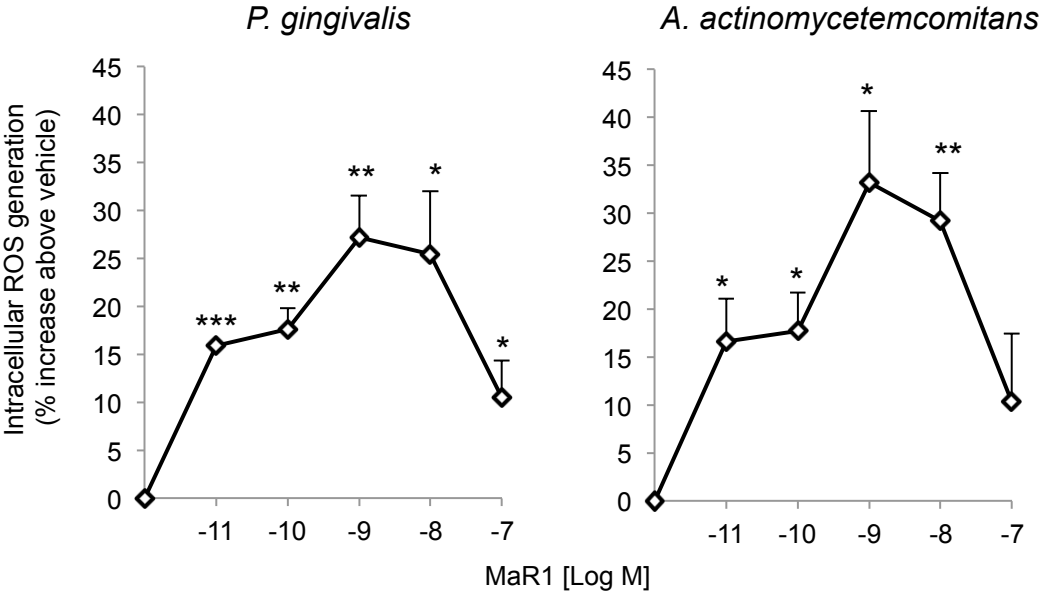

B

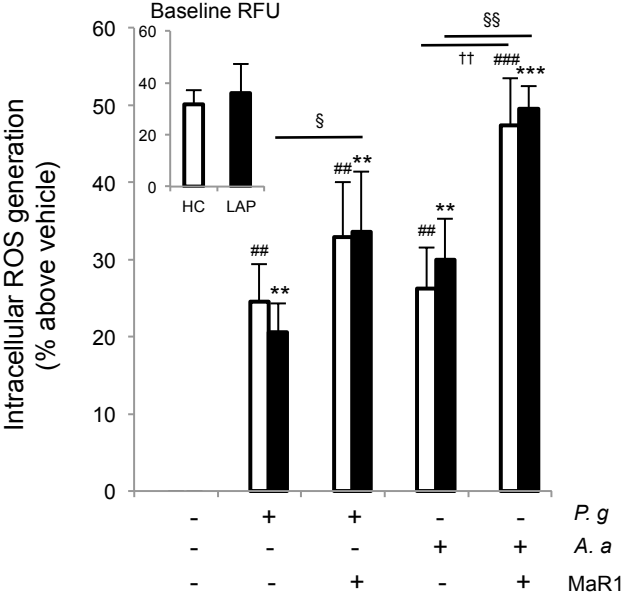

*P. gingivalis* culture

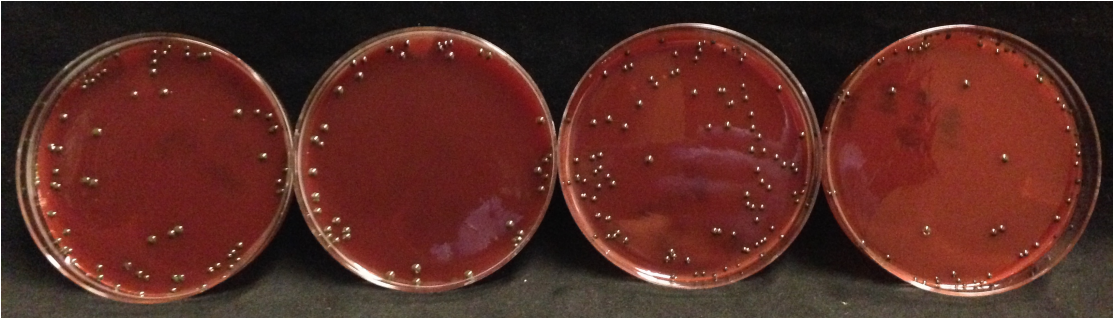

*A. actinomycetemcomitans* culture

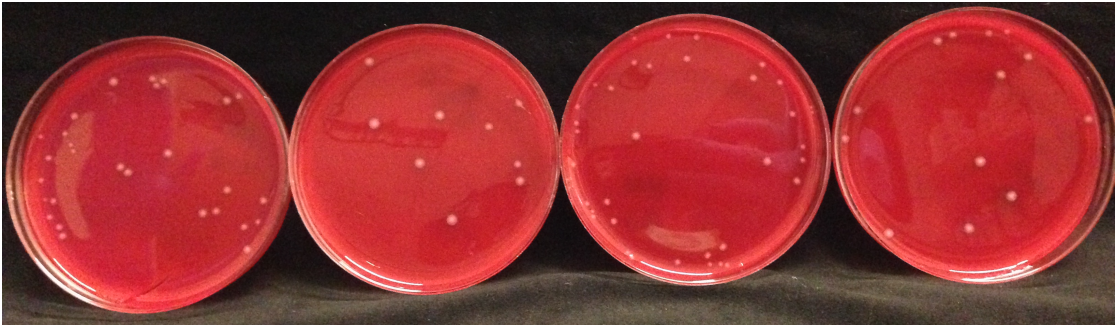

HC

HC+MaR1

LAP

LAP+MaR1

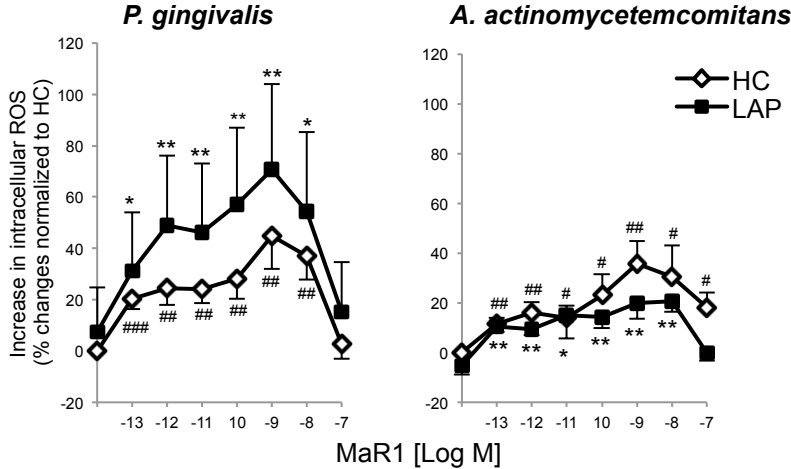

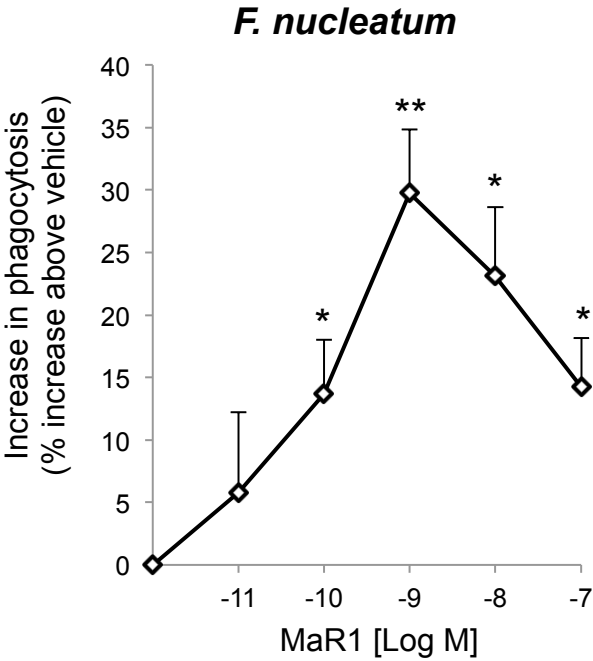

A

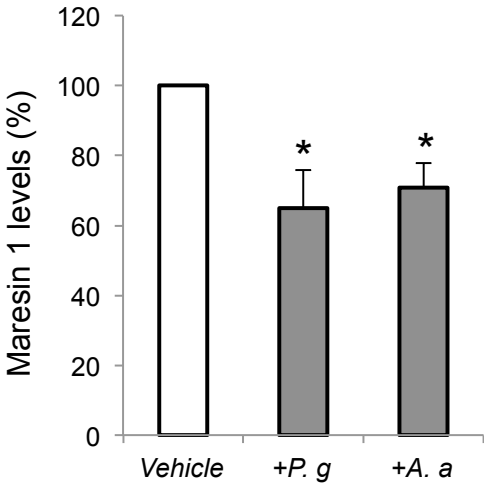

B

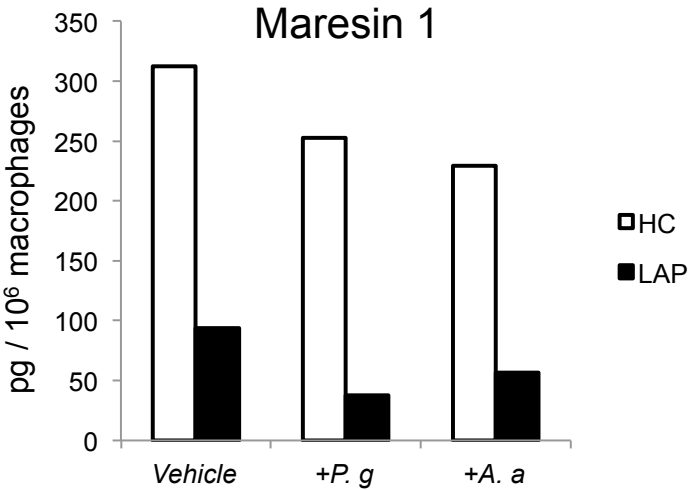

Supplement: IAI.01131-15_zii999091590so1.pdf [file IAI.01131-15_zii999091590so1.pdf]
